# Supplementary material for: Carbon and nitrogen pools in thermokarst-affected permafrost landscapes in Arctic Siberia
Source: Copernicus journal article supplement (doi:10.5194/bg-2017-173), 2017-08-29
Supplement: Supplementary file 1 [file bg-2017-173-supplement.pdf]

# Supplementary Material

## Carbon and nitrogen pools in thermokarst-affected permafrost landscapes in Arctic Siberia

5

Matthias Fuchs<sup>1,2</sup>, Guido Grosse<sup>1,2</sup>, Jens Strauss<sup>1</sup>, Frank Günther<sup>1</sup>, Mikhail Grigoriev<sup>3</sup>, Georgy M. Maximov<sup>3</sup>, Gustaf Hugelius<sup>4</sup>

<sup>1</sup>Alfred Wegener Institute Helmholtz Centre for Polar and Marine Research, 14473 Potsdam, Germany

<sup>2</sup>Institute of Earth and Environmental Sciences, University of Potsdam, 14476 Potsdam, Germany

10 <sup>3</sup>Melnikov Permafrost Institute, 677010 Yakutsk, Russia

<sup>4</sup>Department of Physical Geography, Stockholm University, 106 91 Stockholm, Sweden

*Correspondence to:* Matthias Fuchs (matthias.fuchs@awi.de)

**Table S1:** Sample locations on Sobo-Sise Island and Bykovsky Peninsula

| <b>Transect Site<br/>Sobo-Sise<br/>Island</b> | <b>Latitude<br/>[°]</b> | <b>Longitude<br/>[°]</b> | <b>Sampling<br/>date</b> | <b>Mean organic<br/>layer depth<br/>[cm]</b> | <b>Mean active<br/>layer depth<br/>[cm]</b> | <b>Sample<br/>depth [cm]</b> | <b>Landscape unit</b> |
|-----------------------------------------------|-------------------------|--------------------------|--------------------------|----------------------------------------------|---------------------------------------------|------------------------------|-----------------------|
| SOB14-T1-1                                    | 72.5044                 | 128.0392                 | 13.08.2014               | 14                                           | 26.5                                        | 101                          | Yedoma upland         |
| SOB14-T1-2                                    | 72.5057                 | 128.0373                 | 13.08.2014               | 3                                            | 28.5                                        | 111                          | Yedoma upland         |
| SOB14-T1-3                                    | 72.5070                 | 128.0362                 | 14.08.2014               | 10                                           | 35                                          | 189                          | Yedoma slope          |
| SOB14-T1-4                                    | 72.5083                 | 128.0355                 | 14.08.2014               | 10                                           | 29.6                                        | 186                          | Thermokarst           |
| SOB14-T1-5                                    | 72.5096                 | 128.0344                 | 14.08.2014               | 11                                           | 16.5                                        | 200                          | Thermokarst           |
| SOB14-T2-1                                    | 72.5285                 | 127.9698                 | 15.08.2014               | 4                                            | 47.5                                        | 128                          | Yedoma upland         |
| SOB14-T2-1B                                   | 72.5283                 | 127.9705                 | 15.08.2014               | 7.5                                          | 62.5                                        | 259                          | Baydzherakh           |
| SOB14-T2-2                                    | 72.5285                 | 127.9728                 | 15.08.2014               | 4.5                                          | 39                                          | 238                          | Yedoma upland         |
| SOB14-T2-3                                    | 72.5285                 | 127.9758                 | 16.08.2014               | 3.5                                          | 48                                          | 249                          | Yedoma slope          |
| SOB14-T2-4                                    | 72.5285                 | 127.9789                 | 15.08.2014               | 6                                            | 34                                          | 223                          | Thermokarst           |
| SOB14-T2-5                                    | 72.5285                 | 127.9818                 | 16.08.2014               | 5                                            | 41                                          | 318                          | Thermokarst           |
| SOB14-T2-6                                    | 72.5285                 | 127.9848                 | 16.08.2014               | 2                                            | 83.5                                        | 123                          | Deltaic deposits      |
| SOB14-T2-7                                    | 72.5285                 | 127.9878                 | 16.08.2014               | 0                                            | na                                          | 45                           | Deltaic deposits      |
| SOB14-P-01                                    | 72.5327                 | 128.0390                 | 17.08.2014               | 0                                            | na                                          | 45                           | Deltaic deposit       |
| SOB14-P-02                                    | 72.5246                 | 128.0231                 | 18.08.2014               | 14                                           | 21.5                                        | 187                          | Thermokarst           |
| SOB14-04-A                                    | 71.8518                 | 129.3509                 | 12.08.2014               | 5                                            | na                                          | 165                          | Thermokarst           |

  

| <b>Transect Site<br/>Bykovsky<br/>Peninsula</b> | <b>Latitude<br/>[°]</b> | <b>Longitude<br/>[°]</b> | <b>Sampling<br/>date</b> | <b>Mean organic<br/>layer depth<br/>[cm]</b> | <b>Mean active<br/>layer depth<br/>[cm]</b> | <b>Sample<br/>depth [cm]</b> | <b>Landscape unit</b> |
|-------------------------------------------------|-------------------------|--------------------------|--------------------------|----------------------------------------------|---------------------------------------------|------------------------------|-----------------------|
| BYK14-T2-1                                      | 71.8584                 | 129.2869                 | 29.08.2014               | 8.5                                          | 55                                          | 18                           | Thermokarst           |
| BYK14-T2-1B                                     | 71.8588                 | 129.2882                 | 29.08.2014               | 4                                            | 57                                          | 35                           | Thermokarst           |
| BYK14-T2-2                                      | 71.8595                 | 129.2897                 | 29.08.2014               | 3                                            | 58.5                                        | 111                          | Thermokarst           |
| BYK14-T2-3                                      | 71.8605                 | 129.2928                 | 29.08.2014               | 17                                           | 45                                          | 211                          | Baydzherakh           |
| BYK14-T2-4                                      | 71.8614                 | 129.2953                 | 29.08.2014               | 7.5                                          | 23.5                                        | 125                          | Thermokarst           |
| BYK14-T2-5                                      | 71.8625                 | 129.2981                 | 01.09.2014               | 12                                           | 28                                          | 100                          | Thermokarst           |
| BYK14-T3-1                                      | 71.8193                 | 129.3255                 | 26.08.2014               | na                                           | na                                          | 12                           | Thermokarst           |
| BYK14-T3-2B                                     | 71.8197                 | 129.3232                 | 26.08.2014               | 8                                            | 18                                          | 101                          | Thermokarst           |
| BYK14-T3-3                                      | 71.8206                 | 129.3213                 | 26.08.2014               | 14.5                                         | 28                                          | 208                          | Thermokarst           |
| BYK14-T3-4                                      | 71.8212                 | 129.3194                 | 25.08.2014               | 4                                            | 64                                          | 189                          | Baydzherakh           |
| BYK14-T3-5                                      | 71.8218                 | 129.3172                 | 25.08.2014               | 4.5                                          | 36.5                                        | 112                          | Yedoma upland         |
| BYK14-T3-6                                      | 71.8224                 | 129.3152                 | 25.08.2014               | 5                                            | 45.5                                        | 121                          | Yedoma upland         |
| BYK14-T3-6B                                     | 71.8224                 | 129.3154                 | 25.08.2014               | 7                                            | 33.5                                        | 191                          | Yedoma upland         |

**Table S2:** Laboratory results of soil carbon, nitrogen, and ground ice characteristics for the different geomorphological landscape units on Sobo-Sise Island and Bykovsky Peninsula. All values are median values. +/- values indicate the 75 and 25 percentile.

|                                   | TOC [%]       | TIC [%]          | TN [%]           | C/N [-]        | Vol. ice content [%] | SOC [kg/m <sup>3</sup> ] | Nitrogen [kg/m <sup>3</sup> ] | n   |
|-----------------------------------|---------------|------------------|------------------|----------------|----------------------|--------------------------|-------------------------------|-----|
| <b>Sobo-Sise</b>                  | 2.7 +1.3/-1.0 | 0.08 +0.11/-0.08 | 0.28 +0.07/-0.10 | 10.1 +2.5/-1.6 | 62.0 +9.6/-8.2       | 16.4 +7.8/-5.9           | 1.6 +0.4/-0.5                 | 279 |
| <b>Sobo-Sise Yedoma upland</b>    | 3.5 +1.5/-0.8 | 0.13 +0.17/-0.09 | 0.34 +0.05/-0.05 | 10.8 +2.2/-1.6 | 60.0 +11.8/-5.7      | 19.4 +15.7/-4.0          | 1.8 +0.9/-0.3                 | 85  |
| <b>Sobo-Sise Yedoma slope</b>     | 2.6 +0.7/-0.4 | 0.14 +0.05/-0.06 | 0.28 +0.04/-0.06 | 9.9 +1.2/-0.7  | 61.1 +9.3/-6.8       | 17.5 +9.1/-4.1           | 1.8 +0.4/-0.5                 | 33  |
| <b>Sobo-Sise Thermokarst</b>      | 2.5 +1.4/-0.8 | 0.04 +0.12/-0.04 | 0.25 +0.09/-0.07 | 10.5 +3.0/-2.1 | 64.6 +8.3/-10.1      | 15.7 +7.2/-5.5           | 1.5 +0.4/-0.3                 | 135 |
| <b>Sobo-Sise Fluvial Deposits</b> | 0.7 +0.3/-0.4 | 0.00 +0.04/-0.00 | 0.05 +0.01/-0.00 | 12.2 +2.6/-5.9 | 44.9 +7.6/-10.6      | 9.5 +2.7/-4.5            | 0.7 +0.1/-0.1                 | 26  |
| <b>Bykovsky</b>                   | 3.7 +5.2/-1.8 | 0.39 +0.55/-0.23 | 0.34 +0.27/-0.10 | 10.5 +3.5/-2.4 | 61.7 +11.3/-6.7      | 22.0 +17.2/-8.8          | 2.1 +0.9/-0.6                 | 176 |
| <b>Bykovsky Yedoma upland</b>     | 3.6 +3.4/-1.7 | 0.42 +0.29/-0.16 | 0.34 +0.13/-0.10 | 9.9 +3.3/-1.9  | 61.4 +9.3/-6.7       | 22.7 +14.9/-9.6          | 2.1 +1.1/-0.5                 | 80  |
| <b>Bykovsky Thermokarst</b>       | 3.9 +7.3/-2.1 | 0.36 +1.10/-0.30 | 0.34 +0.41/-0.14 | 11.4 +4.8/-3.0 | 64.9 +11.2/-7.4      | 20.9 +20.2/-7.5          | 2.0 +0.9/-0.7                 | 96  |

**Table S3:** Total landscape SOC and nitrogen stocks for selected depth intervals based on mean sampling site carbon contents.

| Study site                   | SOC            |                |                |                      | Nitrogen       |                |                |                |
|------------------------------|----------------|----------------|----------------|----------------------|----------------|----------------|----------------|----------------|
|                              | Active Layer   | 0-30 cm        | 0-100 cm       | 0-200 cm             | Active Layer   | 0-30 cm        | 0-100 cm       | 0-200 cm       |
| <b>Sobo-Sise Yedoma</b>      | 2.16 Tg        | 1.56 Tg        | 3.19 Tg        | 4.62 Tg              | 0.22 Tg        | 0.13 Tg        | 0.34 Tg        | 0.47 Tg        |
| <b>Sobo-Sise Thermokarst</b> | 1.16 Tg        | 1.03 Tg        | 2.60 Tg        | 4.39 Tg              | 0.07 Tg        | 0.07 Tg        | 0.19 Tg        | 0.38 Tg        |
| <b>Sobo-Sise Fluvial</b>     | 0.01 Tg        | < 0.01 Tg      | 0.02 Tg        | > 0.02 Tg            | < 0.01 Tg      | < 0.01 Tg      | < 0.01 Tg      | > 0.01 Tg      |
| <b>Sobo-Sise Total</b>       | <b>3.34 Tg</b> | <b>2.59 Tg</b> | <b>5.81 Tg</b> | <b>9.00 Tg</b>       | <b>0.29 Tg</b> | <b>0.20 Tg</b> | <b>0.53 Tg</b> | <b>0.86 Tg</b> |
| <b>Bykovsky Yedoma</b>       | 1.62 Tg        | 1.06 Tg        | 2.48 Tg        | 3.29 Tg              | 0.15 Tg        | 0.09 Tg        | 0.22 Tg        | 0.31 Tg        |
| <b>Bykovsky Thermokarst</b>  | 0.69 Tg        | 0.61 Tg        | 1.50 Tg        | 4.17 <sup>a</sup> Tg | 0.05 Tg        | 0.05 Tg        | 0.12 Tg        | 0.32 Tg        |
| <b>Bykovsky Total</b>        | <b>2.31 Tg</b> | <b>1.67 Tg</b> | <b>3.98 Tg</b> | <b>7.45 Tg</b>       | <b>0.20 Tg</b> | <b>0.14 Tg</b> | <b>0.34 Tg</b> | <b>0.62 Tg</b> |
| <b>Total (SOB + BYK)</b>     | 5.66 Tg        | 4.26 Tg        | 9.80 Tg        | 16.46 Tg             | 0.49 Tg        | 0.34 Tg        | 0.87 Tg        | 1.48 Tg        |

5 <sup>a</sup>Only one core collected in a DTLB on Bykovsky Peninsula reached two meter.

**Table S4:** Soil organic carbon (SOC) stocks for the reference depths in kg C m<sup>-2</sup> for all sampled sites. SOC stocks were extrapolated to the next reference depth but not further than 50 cm below the last sample. IW = Ice Wedge, AL = Active layer

| Transect Site<br>Sobo-Sise<br>Island   | SOC<br>0-30 cm | SOC<br>0- 100 cm | SOC<br>0-150 cm | SOC<br>0-200 cm | SOC<br>0-250 cm | SOC<br>0-300 cm | Core<br>depth<br>[cm] | Comment         |
|----------------------------------------|----------------|------------------|-----------------|-----------------|-----------------|-----------------|-----------------------|-----------------|
| SOB14-T1-1                             | 14.91          | 18.19            |                 |                 |                 |                 | 101                   | IW below 83 cm  |
| SOB14-T1-2                             | 14.37          | 21.68            |                 |                 |                 |                 | 111                   |                 |
| SOB14-T1-3                             | 9.44           | 15.24            | 15.24           |                 |                 |                 | 189                   | IW below 99 cm  |
| SOB14-T1-4                             | 10.61          | 18.27            | 27.57           | 30.44           |                 |                 | 186                   | IW below 171 cm |
| SOB14-T1-5                             | 4.31           | 8.82             | 13.38           | 21.31           |                 |                 | 200                   |                 |
| SOB14-T2-1                             | 12.48          | 18.64            |                 |                 |                 |                 | 128                   | IW below 59 cm  |
| SOB14-T2-1B                            | 13.59          | 39.59            | 48.96           | 56.02           | 63.01           | 71.79           | 259                   |                 |
| SOB14-T2-2                             | 10.64          | 28.38            | 38.41           | 47.61           | 55.01           |                 | 238                   |                 |
| SOB14-T2-3                             | 8.61           | 21.65            | 29.29           | 37.26           | 49.86           |                 | 249                   |                 |
| SOB14-T2-4                             | 6.64           | 19.94            | 24.16           | 29.47           | 35.83           |                 | 223                   |                 |
| SOB14-T2-5                             | 4.62           | 16.83            | 23.12           | 28.74           | 34.78           | 40.29           | 318                   |                 |
| SOB14-T2-6                             | 4.37           | 11.20            | 15.23           |                 |                 |                 | 123                   |                 |
| SOB14-T2-7                             | 1.50           |                  |                 |                 |                 |                 | 45                    | Only AL samples |
| SOB14-P-01                             | 1.77           |                  |                 |                 |                 |                 | 45                    | Only AL samples |
| SOB14-P-02                             | 11.99          | 28.14            | 37.50           | 46.07           |                 |                 | 187                   |                 |
| SOB14-04-A                             | 5.27           | 23.30            | 33.32           | 41.60           |                 |                 | 165                   | Only AL samples |
| Transect Site<br>Bykovsky<br>Peninsula | SOC<br>0-30 cm | SOC<br>0- 100 cm | SOC<br>0-150 cm | SOC<br>0-200 cm | SOC<br>0-250 cm | SOC<br>0-300 cm | Core<br>depth<br>[cm] | Comment         |
| BYK14-T2-1                             | 4.92           |                  |                 |                 |                 |                 | 18                    | Only AL samples |
| BYK14-T2-1B                            | 5.47           |                  |                 |                 |                 |                 | 35                    | Only AL samples |
| BYK14-T2-2                             | 4.41           | 13.71            | 22.92           |                 |                 |                 | 111                   |                 |
| BYK14-T2-3                             | 18.72          | 53.78            | 63.41           | 73.86           | 82.52           |                 | 211                   |                 |
| BYK14-T2-4                             | 13.19          | 32.56            | 37.11           |                 |                 |                 | 125                   |                 |
| BYK14-T2-5                             | 12.92          | 20.72            |                 |                 |                 |                 | 100                   |                 |
| BYK14-T3-1                             | 11.54          |                  |                 |                 |                 |                 | 12                    | Only AL samples |
| BYK14-T3-2B                            | 7.10           | 14.45            | 21.26           |                 |                 |                 | 101                   |                 |
| BYK14-T3-3                             | 14.22          | 37.97            | 57.04           | 68.21           | 81.48           |                 | 208                   |                 |
| BYK14-T3-4                             | 7.30           | 21.88            | 33.08           | 38.76           |                 |                 | 189                   |                 |
| BYK14-T3-5                             | 10.33          | 18.52            |                 |                 |                 |                 | 112                   | IW below 53 cm  |
| BYK14-T3-6                             | 10.42          | 21.89            |                 |                 |                 |                 | 121                   | IW below 53 cm  |
| BYK14-T3-6B                            | 13.44          | 32.20            | 39.48           | 44.14           |                 |                 | 191                   |                 |

**Table S5:** Soil nitrogen (total nitrogen, TN) stocks for the reference depths in kg C m<sup>-2</sup> for all sampled sites. TN stocks were extrapolated to the next reference depth but not further than 50 cm below the last sample. IW = Ice Wedge, AL = Active layer

| Transect Site<br>Sobo-Sise<br>Island   | TN<br>0-30 cm | TN<br>0- 100 cm | TN<br>0-150 cm | TN<br>0-200 cm | TN<br>0-250 cm | TN<br>0-300 cm | Core<br>depth<br>[cm] | Comment         |
|----------------------------------------|---------------|-----------------|----------------|----------------|----------------|----------------|-----------------------|-----------------|
| SOB14-T1-1                             | 0.79          | 0.98            |                |                |                |                | 101                   | IW below 83 cm  |
| SOB14-T1-2                             | 0.98          | 1.46            |                |                |                |                | 111                   |                 |
| SOB14-T1-3                             | 0.75          | 1.33            | 1.33           |                |                |                | 189                   | IW below 99 cm  |
| SOB14-T1-4                             | 0.76          | 1.83            | 2.85           | 3.25           |                |                | 186                   | IW below 171 cm |
| SOB14-T1-5                             | 0.39          | 0.84            | 1.22           | 2.18           |                |                | 200                   |                 |
| SOB14-T2-1                             | 1.04          | 2.71            |                |                |                |                | 128                   | IW below 59 cm  |
| SOB14-T2-1B                            | 1.40          | 3.94            | 4.96           | 5.80           | 6.54           | 7.38           | 259                   |                 |
| SOB14-T2-2                             | 1.35          | 3.88            | 4.63           | 5.44           | 6.21           |                | 238                   |                 |
| SOB14-T2-3                             | 0.78          | 2.08            | 2.76           | 3.59           | 4.75           |                | 249                   |                 |
| SOB14-T2-4                             | 0.28          | 1.20            | 1.52           | 2.17           | 2.80           |                | 223                   |                 |
| SOB14-T2-5                             | 0.20          | 1.16            | 1.97           | 2.70           | 3.45           | 4.28           | 318                   |                 |
| SOB14-T2-6                             | 0.15          | 0.41            | 0.49           |                |                |                | 123                   |                 |
| SOB14-T2-7                             | 0.00          |                 |                |                |                |                | 45                    | Only AL samples |
| SOB14-P-01                             | 0.00          |                 |                |                |                |                | 45                    | Only AL samples |
| SOB14-P-02                             | 0.66          | 1.71            | 2.58           | 3.53           |                |                | 187                   |                 |
| SOB14-04-A                             | 0.48          | 1.87            | 2.66           | 3.50           |                |                | 165                   | Only AL samples |
| Transect Site<br>Bykovsky<br>Peninsula | TN<br>0-30 cm | TN<br>0- 100 cm | TN<br>0-150 cm | TN<br>0-200 cm | TN<br>0-250 cm | TN<br>0-300 cm | Core<br>depth<br>[cm] | Comment         |
| BYK14-T2-1                             | 0.48          |                 |                |                |                |                | 18                    | Only AL samples |
| BYK14-T2-1B                            | 0.77          |                 |                |                |                |                | 35                    | Only AL samples |
| BYK14-T2-2                             | 0.63          | 2.06            | 3.30           |                |                |                | 111                   |                 |
| BYK14-T2-3                             | 1.44          | 4.03            | 4.85           | 5.68           | 6.75           |                | 211                   |                 |
| BYK14-T2-4                             | 0.88          | 2.19            | 2.76           |                |                |                | 125                   |                 |
| BYK14-T2-5                             | 0.67          | 1.48            |                |                |                |                | 100                   |                 |
| BYK14-T3-1                             | 0.92          |                 |                |                |                |                | 12                    | Only AL samples |
| BYK14-T3-2B                            | 0.59          | 1.14            | 1.88           |                |                |                | 101                   |                 |
| BYK14-T3-3                             | 0.99          | 2.69            | 4.11           | 5.16           | 6.32           |                | 208                   |                 |
| BYK14-T3-4                             | 0.80          | 2.73            | 4.00           | 4.73           |                |                | 189                   |                 |
| BYK14-T3-5                             | 0.95          | 1.66            |                |                |                |                | 112                   | IW below 53 cm  |
| BYK14-T3-6                             | 0.85          | 1.64            |                |                |                |                | 121                   | IW below 53 cm  |
| BYK14-T3-6B                            | 1.24          | 2.71            | 3.54           | 4.30           |                |                | 191                   |                 |

**Table S6:** Sediment (sedim. rate) accumulation rate corrected for core ice content. Sediment accumulation rate is based on the depth of the sample and the calibrated radiocarbon date. Mean sediment accumulation rate is calculated always referring to the soil surface (depth = 0 cm and Cum SOC = 0 kg C m<sup>-2</sup>). Relative sediment accumulation rate is calculated always referring to the sample above a particular sample.

| Sample                | Age <sup>a</sup><br>[calib yr BP] | Depth<br>[cm] | Mean<br>sedim. rate<br>[mm yr <sup>-1</sup> ] | Relative<br>sedim. rate<br>[mm yr <sup>-1</sup> ] |
|-----------------------|-----------------------------------|---------------|-----------------------------------------------|---------------------------------------------------|
| <b>SOB14-T1-1-3</b>   | 842                               | 19.5-23.5     | 0.26                                          | 0.26                                              |
| <b>SOB14-T1-5-2</b>   | modern                            | 10-11         | na                                            | na                                                |
| <b>SOB14-T1-5-15</b>  | 5058                              | 148-150       | 0.12                                          | 0.12                                              |
| <b>SOB14-T1-5-19</b>  | 7481                              | 187-200       | 0.12                                          | 0.07                                              |
| <b>SOB14-T2-2-7</b>   | 1329                              | 55-65         | 0.29                                          | 0.29                                              |
| <b>SOB14-T2-2-16</b>  | 3272                              | 119-122       | 0.17                                          | 0.11                                              |
| <b>SOB14-T2-2-24</b>  | 7113.5                            | 173-179       | 0.11                                          | 0.05                                              |
| <b>SOB14-T2-2-30</b>  | 9807                              | 218-223       | 0.09                                          | 0.05                                              |
| <b>SOB14-T2-5-2</b>   | modern                            | 5-6           | na                                            | na                                                |
| <b>SOB14-T2-5-10</b>  | 168                               | 67-74         | 2.31                                          | 2.31                                              |
| <b>SOB14-T2-5-19</b>  | 364                               | 145-156       | 2.15                                          | 1.76                                              |
| <b>SOB14-T2-5-31</b>  | 5517                              | 273-278       | 0.24                                          | 0.10                                              |
| <b>SOB14-T2-5-34</b>  | 842                               | 298.5-302.5   | 1.61                                          | 0.97                                              |
| <b>BYK14-T2-3-2b</b>  | 615                               | 14-16         | 0.24                                          | 0.24                                              |
| <b>BYK14-T2-3-4</b>   | 1109                              | 40-45         | 0.38                                          | 0.56                                              |
| <b>BYK14-T2-3-8</b>   | 1576                              | 68-75         | 0.26                                          | 0.35                                              |
| <b>BYK14-T2-3-19</b>  | 2812                              | 159-167       | 0.26                                          | 0.27                                              |
| <b>BYK14-T2-3-20</b>  | 45203                             | 178-179       | 0.02                                          | 0.001                                             |
| <b>BYK14-T2-4-4</b>   | 615                               | 23-24         | 0.38                                          | 0.38                                              |
| <b>BYK14-T2-4-10</b>  | 1222                              | 45-48         | 0.26                                          | 0.18                                              |
| <b>BYK14-T2-4-16</b>  | 1449                              | 76-79         | 0.29                                          | 0.44                                              |
| <b>BYK14-T2-4-22</b>  | 9368                              | 117-125       | 0.06                                          | 0.02                                              |
| <b>BYK14-T3-6B-14</b> | 15533                             | 110-116       | 0.04                                          | 0.04                                              |
| <b>BYK14-T3-6B-18</b> | 16048                             | 142-148       | 0.04                                          | 0.24                                              |
| <b>BYK14-T3-6B-23</b> | 17970                             | 185-191       | 0.04                                          | 0.09                                              |

<sup>a</sup>radiocarbon dates were calibrated with the Calib 7.1 software (Stuiver et al., 2017)

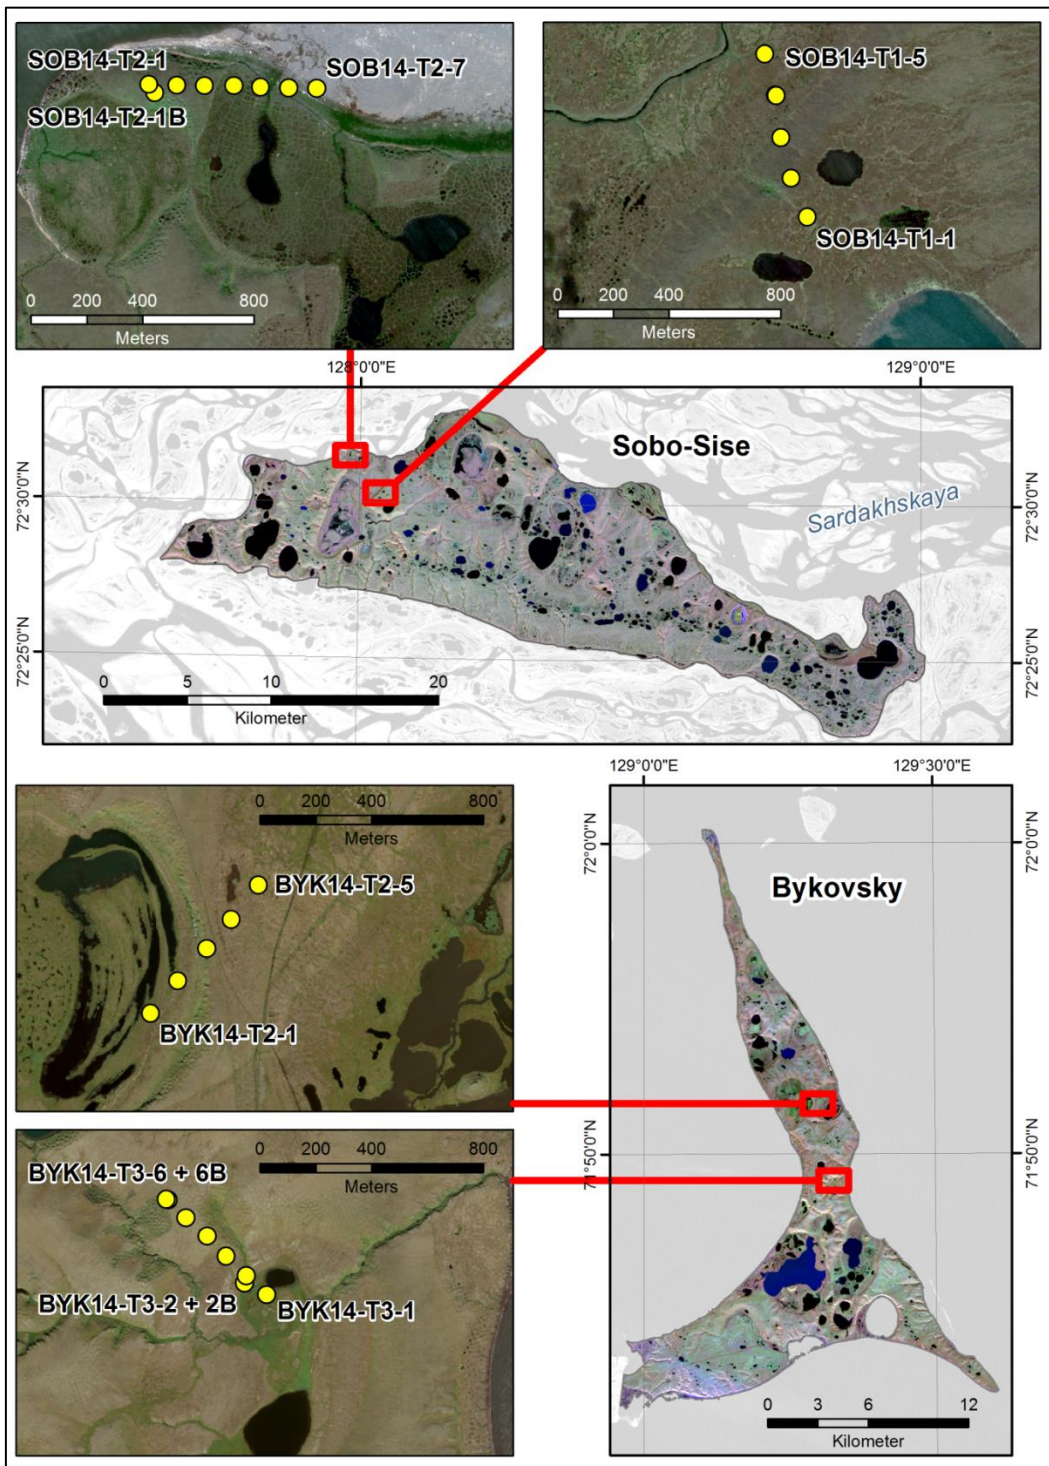



**Figure S1:** Transects sites on Sobo-Sise Island and Bykovsky Peninsula. The overview maps from Sobo-Sise Island and Bykovsky Peninsula include a Landsat 5 satellite image with a false colour composite (short wave infrared – near infrared – red), (Acquisition date: 19<sup>th</sup> Sept. 2009, path 29, row 009). The detailed maps from the transect sites on Sobo-Sise Island include a GeoEye scene (acquisition date: 27<sup>th</sup> July 2014, ©DigitalGlobe) and the detailed maps from Bykovsky Peninsula include a WorldView2 image (acquisition date: 29<sup>th</sup> Aug. 2015, ©DigitalGlobe). All four detailed maps include natural colour images with the bands red-green-blue (bands 3-2-1 for GeoEye images and bands 5-3-2 for WorldView2 images). BYK14-T3-2 was not sampled due to terrain conditions unfavourable to sample. Therefore the alternative site BYK14-T3-2B was chosen.

## References

Stuiver, M., Reimer, P.J., and Reimer, R.W., 2017, CALIB 7.1 [WWW program] at <http://calib.org>, accessed 2017-3-6, 2017.
